# Supplementary material for: Highly-transmissible Variants of SARS-CoV-2 May Be More Susceptible to Drug Therapy Than Wild Type Strains
Source: Research Square preprint supplement (doi:10.21203/rs.3.rs-379291/v1), 2021-04-15
Supplement: Supplementary file 1 [file 885835963102220c3185dbc7.pdf]

## Highly-transmissible variants of SARS-CoV-2 may be more susceptible to drug therapy than wild type strains

### Supplementary Information

**Table S1 - Simulated within-host viral kinetics at different levels of cellular infectivity (given as multiples of  $R_0=3.79$ ). dpi: days post infection; d: day; min Ct: minimum serial cycle threshold values; AUC: area under the curve;  $\Delta AUC\%$ : percentage difference in AUC compared to wild-type**

| Infectivity                          | Start positivity [dpi] | Duration [d] | Ctmin | AUC [d*log(copies/mL)] | $\Delta AUC\%$ |
|--------------------------------------|------------------------|--------------|-------|------------------------|----------------|
| wild type ( $R_0$ )                  | 5.4                    | 13.5         | 28.4  | 12003                  | 100%           |
| <b>highly transmissible mutation</b> |                        |              |       |                        |                |
| $R_0*1.25$                           | 3.7                    | 12.7         | 27.4  | 18278                  | 152%           |
| $R_0*1.5$                            | 2.9                    | 12.1         | 26.5  | 26648                  | 222%           |
| $R_0*2$                              | 2.1                    | 11.4         | 25.2  | 48197                  | 402%           |
| <b>less transmissible mutation</b>   |                        |              |       |                        |                |
| $R_0*0.75$                           | 9.1                    | 15.1         | 29.6  | 7975                   | 66%            |

**Table S2 - Simulated effects of treatment with ivermectin 600 ug/kg for 3d by infectivity (given as multiples of  $R_0=3.79$ ) and time of treatment initiation. dpi: days post infection; d: day; min Ct: minimum serial cycle threshold values; AUC: area under the curve;  $\Delta AUC\%$ : percentage difference in AUC compared to wild-type.**

| Infectivity                         | Treatment initiation [dpi] | Start positivity [dpi] | Duration [d] | Ctmin | AUC [d*log(copies/mL)] | $\Delta AUC\%$ |
|-------------------------------------|----------------------------|------------------------|--------------|-------|------------------------|----------------|
| <b>wild type</b>                    |                            |                        |              |       |                        |                |
| <b><math>R_0</math></b>             | -2                         | 7                      | 13.1         | 28.7  | 10286                  | 86%            |
|                                     | -1                         | 7.4                    | 13           | 28.8  | 9897                   | 82%            |
|                                     | 0                          | 7.8                    | 12.9         | 28.8  | 9618                   | 80%            |
|                                     | 1                          | 7.8                    | 13           | 28.8  | 9569                   | 80%            |
|                                     | 2                          | 7.8                    | 13           | 28.8  | 9490                   | 79%            |
|                                     | 3                          | 7.7                    | 13.2         | 28.9  | 9425                   | 79%            |
|                                     | 4                          | 7.4                    | 13.5         | 28.9  | 9376                   | 78%            |
|                                     | 5                          | 5.9                    | 15.1         | 29.0  | 9337                   | 78%            |
|                                     | 6                          | 5.4                    | 15.6         | 29.1  | 9295                   | 77%            |
|                                     | 7                          | 5.4                    | 15.5         | 29.3  | 9251                   | 77%            |
|                                     | <i>untreated</i>           | 5.4                    | 13.5         | 28.4  | 12003                  | 100%           |
| <b>highly transmissible mutants</b> |                            |                        |              |       |                        |                |
| <b><math>R_0*1.25</math></b>        | -2                         | 5.1                    | 12.3         | 27.8  | 14408                  | 79%            |
|                                     | -1                         | 5.5                    | 12.2         | 27.9  | 13521                  | 74%            |
|                                     | 0                          | 5.8                    | 12.1         | 28.0  | 12885                  | 70%            |
|                                     | 1                          | 5.7                    | 12.3         | 28.1  | 12759                  | 70%            |
|                                     | 2                          | 5.5                    | 12.5         | 28.1  | 12598                  | 69%            |
|                                     | 3                          | 4.6                    | 13.5         | 28.2  | 12499                  | 68%            |
|                                     | 4                          | 3.7                    | 14.3         | 28.3  | 12507                  | 68%            |
|                                     | 5                          | 3.7                    | 14.2         | 28.4  | 12687                  | 69%            |

Schöning, Sars2variants (2021)

| Infectivity                        | Treatment initiation [dpi] | Start positivity [dpi] | Duration [d] | Ctmin | AUC [d*log(copies/mL)] | ΔAUC% |
|------------------------------------|----------------------------|------------------------|--------------|-------|------------------------|-------|
|                                    | 6                          | 3.7                    | 14           | 28.5  | 13257                  | 73%   |
|                                    | 7                          | 3.7                    | 13.4         | 27.9  | 14530                  | 80%   |
|                                    | <i>untreated</i>           | 3.7                    | 12.7         | 27.4  | 18278                  | 100%  |
| <b>R0*1.5</b>                      |                            |                        |              |       |                        |       |
|                                    | -2                         | 4                      | 11.8         | 27.0  | 19817                  | 74%   |
|                                    | -1                         | 4.3                    | 11.8         | 27.2  | 18239                  | 68%   |
|                                    | 0                          | 4.5                    | 11.8         | 27.3  | 17118                  | 64%   |
|                                    | 1                          | 4.3                    | 12.1         | 27.4  | 16921                  | 64%   |
|                                    | 2                          | 3.6                    | 12.8         | 27.4  | 16733                  | 63%   |
|                                    | 3                          | 2.9                    | 13.4         | 27.6  | 16772                  | 63%   |
|                                    | 4                          | 2.9                    | 13.3         | 27.7  | 17305                  | 65%   |
|                                    | 5                          | 2.9                    | 12.9         | 27.4  | 18947                  | 71%   |
|                                    | 6                          | 2.9                    | 12.4         | 26.9  | 21771                  | 82%   |
|                                    | 7                          | 2.9                    | 12.1         | 26.5  | 24258                  | 91%   |
|                                    | <i>untreated</i>           | 2.9                    | 12.1         | 26.5  | 26648                  | 100%  |
| <b>R0*2</b>                        |                            |                        |              |       |                        |       |
|                                    | -2                         | 2.8                    | 11.4         | 25.8  | 33795                  | 70%   |
|                                    | -1                         | 3.1                    | 11.3         | 26.0  | 30420                  | 63%   |
|                                    | 0                          | 3.1                    | 11.5         | 26.2  | 28108                  | 58%   |
|                                    | 1                          | 2.6                    | 11.9         | 26.2  | 28014                  | 58%   |
|                                    | 2                          | 2.1                    | 12.3         | 26.3  | 28386                  | 59%   |
|                                    | 3                          | 2.1                    | 12           | 26.4  | 30456                  | 63%   |
|                                    | 4                          | 2.1                    | 11.6         | 25.7  | 35944                  | 75%   |
|                                    | 5                          | 2.1                    | 11.4         | 25.2  | 42350                  | 88%   |
|                                    | 6                          | 2.1                    | 11.3         | 25.2  | 45835                  | 95%   |
|                                    | 7                          | 2.1                    | 11.3         | 25.2  | 47181                  | 98%   |
|                                    | <i>untreated</i>           | 2.1                    | 11.4         | 25.2  | 48197                  | 100%  |
| <b>less transmissible mutation</b> |                            |                        |              |       |                        |       |
| <b>R0*0.75</b>                     |                            |                        |              |       |                        |       |
|                                    | -2                         | 10.9                   | 14.8         | 29.7  | 7483                   | 94%   |
|                                    | -1                         | 11.4                   | 14.7         | 29.7  | 7374                   | 93%   |
|                                    | 0                          | 11.8                   | 14.7         | 29.7  | 7296                   | 92%   |
|                                    | 1                          | 11.8                   | 14.7         | 29.7  | 7290                   | 91%   |
|                                    | 2                          | 11.9                   | 14.7         | 29.7  | 7271                   | 91%   |
|                                    | 3                          | 11.9                   | 14.8         | 29.7  | 7254                   | 91%   |
|                                    | 4                          | 11.9                   | 14.8         | 29.7  | 7241                   | 91%   |
|                                    | 5                          | 11.9                   | 14.8         | 29.7  | 7229                   | 91%   |
|                                    | 6                          | 11.8                   | 15           | 29.7  | 7212                   | 91%   |
|                                    | 7                          | 11.6                   | 15.2         | 29.8  | 7187                   | 90%   |
|                                    | <i>untreated</i>           | 9.1                    | 15.1         | 29.6  | 7969                   | 100%  |
